# Supplementary material for: Anti-Tumor Activity and Immunotherapeutic Potential of a Bisphosphonate Prodrug
Source: PubMed Central journal article supplement (PMC5519590; doi:10.1038/s41598-017-05553-0), 2017-07-20
Supplement: 41598_2017_5553_MOESM1_ESM.pdf [file 41598_2017_5553_MOESM1_ESM.pdf]

## Supporting Information

### **Anti-Tumor Activity and Immunotherapeutic Potential of a Bisphosphonate Prodrug**

Yoshimasa Tanaka\*, Masashi Iwasaki, Kaoru Murata-Hirai, Kenji Matsumoto, Kosuke Hayashi, Haruki Okamura, Tomoharu Sugie, Nagahiro Minato, Craig T. Morita and Masakazu Toi

Y. Tanaka, M. Iwasaki, K. Murata-Hirai, K. Matsumoto, K. Hayashi  
Center for Innovation in Immunoregulative Technology and Therapeutics, Graduate School of Medicine, Kyoto University, Kyoto, Japan

H. Okamura  
Department of Tumor Immunology and Cell Therapy, Hyogo College of Medicine, Nishinomiya, Japan

T. Sugie, M. Toi  
Department of Surgery, Graduate School of Medicine, Kyoto University, Kyoto, Japan

N. Minato, Y. Tanaka  
Department of Immunology and Cell Biology, Graduate School of Medicine, Kyoto University, Kyoto, Japan

C. T. Morita  
Department of Internal Medicine and the Interdisciplinary Graduate Program in Immunology, University of Iowa Carver College of Medicine, Veterans Affairs Health Care System, Iowa City, IA U.S.A.

Y. Tanaka  
Center for Bioinformatics and Molecular Medicine, Graduate School of Biomedical Sciences, Nagasaki University, Nagasaki, Japan.

\*Correspondence: Dr. Yoshimasa Tanaka, 1-12-4 Sakamoto, Nagasaki 852-8523, Japan, Email: [ystanaka@nagasaki-u.ac.jp](mailto:ystanaka@nagasaki-u.ac.jp)

**Supplemental Table S1. Comparison of TNF- $\alpha$  secretion from  $\gamma\delta$  T cells in response to EJ-1 tumor cells pretreated with pivoxil ester prodrugs and their corresponding acids<sup>1</sup>**

| PE : H # | TNF- $\alpha$ EC <sub>50</sub> (nM) |          | Ratio                                   |
|----------|-------------------------------------|----------|-----------------------------------------|
|          | PE                                  | H        | PE EC <sub>50</sub> :H EC <sub>50</sub> |
| 1 : 8    | 550                                 | >100,000 | 1 : >180                                |
| 2 : 9    | 4,500                               | >100,000 | 1 : > 20                                |
| 3 : 10   | 480                                 | 48,000   | 1 : 100                                 |
| 4 : 11   | 700                                 | >100,000 | 1 : >140                                |
| 5 : 12   | 69                                  | 49,000   | 1 : 710                                 |
| 6 : 13   | 80                                  | 48,000   | 1 : 600                                 |
| 7 : 14   | 60                                  | 68,000   | 1 : 1,100                               |

<sup>1</sup>Concentrations of pivoxil ester prodrugs required to stimulate half maximal TNF- $\alpha$  secretion (EC<sub>50</sub>) by  $\gamma\delta$  T cells in response to prodrug-pretreated EJ-1 tumor cells were compared with those with the corresponding acid forms: PE; pivoxil ester BP prodrugs and H; corresponding BP acids.

**Supplemental Table S2. Stimulation of TNF- $\alpha$  secretion by  $\gamma\delta$  T cells with EJ-1 tumor cells pretreated by pivoxil ester prodrugs<sup>1</sup>**

| <b>Compound</b> | <b>TNF-<math>\alpha</math> EC<sub>50</sub><br/>(nM)</b> | <b>Compound</b> | <b>TNF-<math>\alpha</math> EC<sub>50</sub><br/>(nM)</b> |
|-----------------|---------------------------------------------------------|-----------------|---------------------------------------------------------|
| 7               | 60                                                      | 36              | 8,000                                                   |
| 39              | 62                                                      | 15              | >10,000                                                 |
| 34              | 63                                                      | 17              | >10,000                                                 |
| 18              | 380                                                     | 19              | >10,000                                                 |
| 31              | 1,600                                                   | 21              | >10,000                                                 |
| 38              | 1,900                                                   | 24              | >10,000                                                 |
| 23              | 3,400                                                   | 25              | >10,000                                                 |
| 33              | 3,600                                                   | 26              | >10,000                                                 |
| 20              | 3,700                                                   | 29              | >10,000                                                 |
| 32              | 4,400                                                   | 30              | >10,000                                                 |
| 27              | 4,600                                                   | 35              | >10,000                                                 |
| 22              | 4,800                                                   | 37              | >10,000                                                 |
| 16              | 5,100                                                   | 40              | >10,000                                                 |
| 28              | 6,500                                                   | 41              | >10,000                                                 |
| 42              | 7,100                                                   |                 |                                                         |

<sup>1</sup>Concentrations of pivoxil ester prodrugs required to stimulate half maximal TNF- $\alpha$  secretion (EC<sub>50</sub>) by  $\gamma\delta$  T cells in response to prodrug-pretreated EJ-1 tumor cells.

**Supplemental Table 3. 7 and zoledronic acid activity against various human tumor cell lines<sup>1</sup>**

| Tumor cell line | Cell lineage                         | Cell growth inhibition     |                              | TNF- $\alpha$ stimulation  |                              | RAP1A inhibition           |                              | Cell growth inhibition<br>Fold Difference Zol/7 | TNF- $\alpha$ stimulation<br>Fold Difference Zol/7 | RAP1A inhibition<br>Fold Difference Zol/7 |
|-----------------|--------------------------------------|----------------------------|------------------------------|----------------------------|------------------------------|----------------------------|------------------------------|-------------------------------------------------|----------------------------------------------------|-------------------------------------------|
|                 |                                      | 7<br>IC <sub>50</sub> (nM) | Zol<br>IC <sub>50</sub> (nM) | 7<br>EC <sub>50</sub> (nM) | Zol<br>EC <sub>50</sub> (nM) | 7<br>IC <sub>50</sub> (nM) | Zol<br>IC <sub>50</sub> (nM) |                                                 |                                                    |                                           |
| C1R             | B cell lymphoma                      | 78                         | 19000                        | 530                        | 500000                       | 56                         | 300000                       | 243.6                                           | 943.4                                              | 5357.1                                    |
| RAMOS-RA1       | Burkitt's lymphoma                   | 110                        | 100000                       | 140                        | 260000                       | 61                         | 530000                       | 909.1                                           | 1857.1                                             | 8688.5                                    |
| Daudi           | Burkitt's lymphoma                   | 750                        | 240000                       | 42                         | 55000                        | 75                         | 9200                         | 320.0                                           | 1309.5                                             | 122.7                                     |
| Raji            | Burkitt's lymphoma                   | 1600                       | 63000                        | 53                         | 270000                       | 62                         | 350000                       | 39.4                                            | 5094.3                                             | 5645.2                                    |
| RPMI8226        | Multiple myeloma                     | 37                         | 3500                         | 24                         | 2300                         | 32                         | 37000                        | 94.6                                            | 95.8                                               | 1156.3                                    |
| HL60            | Acute promyelocytic leukemia         | 81                         | 460000                       | 53                         | 520000                       | 56                         | 510000                       | 5679.0                                          | 9811.3                                             | 9107.1                                    |
| NOMO-1          | Acute myeloid leukemia               | 36                         | 28000                        | 45                         | 54000                        | 5.5                        | 330000                       | 777.8                                           | 1200.0                                             | 60000.0                                   |
| SCC-3           | Monocyte-like cell line              | 180                        | 13000                        | 81                         | 72000                        | 550                        | 72000                        | 72.2                                            | 888.9                                              | 130.9                                     |
| THP-1           | Acute monocytic leukemia             | 35                         | 14000                        | 300                        | 440000                       | 18                         | 480000                       | 400.0                                           | 1466.7                                             | 26666.7                                   |
| U937            | Histiocytic lymphoma (monocyte-like) | 260                        | 16000                        | 60                         | 460000                       | 47                         | 57000                        | 61.5                                            | 7666.7                                             | 1212.8                                    |
| P31/FUJ         | Acute myeloid leukemia               | 130                        | 65000                        | 56                         | 72000                        | 7                          | 510000                       | 500.0                                           | 1285.7                                             | 72857.1                                   |
| K562            | Erythroleukemia                      | 29                         | 2900                         | 80                         | 66000                        | 66                         | 8900                         | 100.0                                           | 825.0                                              | 134.8                                     |
| J.RT3.-T3.5     | T cell acute lymphoblastic leukemia  | 150                        | 20000                        | 170                        | 430000                       | 130                        | 96000                        | 133.3                                           | 2529.4                                             | 738.5                                     |
| MOLT-3          | T cell acute lymphoblastic leukemia  | 130                        | 74000                        | 66                         | 530000                       | 370                        | 500000                       | 569.2                                           | 8030.3                                             | 1351.4                                    |
| MOLT-4          | T cell acute lymphoblastic leukemia  | 160                        | 71000                        | 59                         | 63000                        | 72                         | 550000                       | 443.8                                           | 1067.8                                             | 7638.9                                    |
| PEER            | T cell acute lymphoblastic leukemia  | 23                         | 55000                        | 83                         | 510000                       | 55                         | 280000                       | 2391.3                                          | 6144.6                                             | 5090.9                                    |
| HMC-1-8         | Breast cancer                        | 880                        | 21000                        | 920                        | 200000                       | 550                        | 67000                        | 23.9                                            | 217.4                                              | 121.8                                     |
| MCF-7           | Breast cancer                        | 560                        | 26000                        | 510                        | 66000                        | 94                         | 85000                        | 46.4                                            | 129.4                                              | 904.3                                     |
| MDA-MB-231      | Breast cancer                        | 1000                       | 9400                         | 600                        | 63000                        | 63                         | 26000                        | 9.4                                             | 105.0                                              | 412.7                                     |
| MRK-nu-1        | Breast cancer                        | 740                        | 19000                        | 180                        | 380000                       | 850                        | 47000                        | 25.7                                            | 2111.1                                             | 55.3                                      |
| SK-BR-3         | Breast cancer                        | 610                        | 18000                        | 340                        | 30000                        | 63                         | 77000                        | 29.5                                            | 88.2                                               | 1222.2                                    |
| T-47-D          | Breast cancer                        | 350                        | 17000                        | 72                         | 55000                        | 570                        | 290000                       | 48.6                                            | 763.9                                              | 508.8                                     |
| YMB-1-E         | Breast cancer                        | 950                        | 89000                        | 630                        | 520000                       | 5500                       | 550000                       | 93.7                                            | 825.4                                              | 100.0                                     |
| 786-0           | Renal cell carcinoma                 | 880                        | 2900                         | 65                         | 50000                        | 7.9                        | 67000                        | 3.3                                             | 769.2                                              | 8481.0                                    |
| 786-0W          | Renal cell carcinoma                 | 230                        | 3200                         | 69                         | 54000                        | 250                        | 8800                         | 13.9                                            | 782.6                                              | 35.2                                      |
| A-704           | Renal cell carcinoma                 | 400                        | 4600                         | 720                        | 51000                        | 200                        | 48000                        | 11.5                                            | 70.8                                               | 240.0                                     |
| ACHN            | Renal cell carcinoma                 | 320                        | 6600                         | 93                         | 930                          | 540                        | 9600                         | 20.6                                            | 10.0                                               | 17.8                                      |
| Caki-1          | Renal cell carcinoma                 | 960                        | 8100                         | 120                        | 47000                        | 550                        | 72000                        | 8.4                                             | 391.7                                              | 130.9                                     |
| UOK111          | Renal cell carcinoma                 | 1900                       | 5100                         | 500                        | 6300                         | 90                         | 57000                        | 2.7                                             | 12.6                                               | 633.3                                     |
| UOK121          | Renal cell carcinoma                 | 970                        | 1300                         | 500                        | 39000                        | 700                        | 46000                        | 1.3                                             | 78.0                                               | 65.7                                      |
| VMRC-RCW        | Renal cell carcinoma                 | 3100                       | 13000                        | 440                        | 13000                        | 510                        | 500000                       | 4.2                                             | 29.5                                               | 980.4                                     |
| VMRC-RCZ        | Renal cell carcinoma                 | 300                        | 3200                         | 250                        | 54000                        | 290                        | 48000                        | 10.7                                            | 216.0                                              | 165.5                                     |
| EJ-1            | Bladder cancer                       | 26                         | 2000                         | 60                         | 5500                         | 9.4                        | 7600                         | 21.3                                            | 91.7                                               | 808.5                                     |
| T24             | Bladder cancer                       | 1100                       | 2600                         | 340                        | 42000                        | 8                          | 4200                         | 2.4                                             | 123.5                                              | 525.0                                     |
| TGBC1TKB        | Cholangiocarcinoma (Gallbladder)     | 660                        | 9800                         | 94                         | 17000                        | 53                         | 51000                        | 14.8                                            | 180.9                                              | 962.3                                     |
| TCBC2TKB        | Cholangiocarcinoma (Gallbladder)     | 2300                       | 2800                         | 85                         | 36000                        | 72                         | 9700                         | 1.2                                             | 423.5                                              | 134.7                                     |
| TCBC24TKB       | Cholangiocarcinoma (Gallbladder)     | 410                        | 3700                         | 430                        | 30000                        | 500                        | 67000                        | 9.0                                             | 69.8                                               | 134.0                                     |
| HuCCT1          | Cholangiocarcinoma                   | 140                        | 12000                        | 67                         | 54000                        | 70                         | 71000                        | 85.7                                            | 806.0                                              | 1014.3                                    |
| MZChA2          | Cholangiocarcinoma (Gallbladder)     | 530                        | 1100                         | 620                        | 80000                        | 55                         | 3600                         | 2.1                                             | 129.0                                              | 65.5                                      |
| TFK1            | Cholangiocarcinoma                   | 100                        | 9500                         | 66                         | 52000                        | 210                        | 81000                        | 95.0                                            | 787.9                                              | 385.7                                     |
| ACS             | Gastric cancer                       | 270                        | 3800                         | 97                         | 65000                        | 550                        | 50000                        | 14.1                                            | 670.1                                              | 90.9                                      |
| AGS             | Gastric cancer                       | 290                        | 2700                         | 79                         | 71000                        | 600                        | 58000                        | 9.3                                             | 898.7                                              | 96.7                                      |

|          |                            |      |       |     |        |     |        |       |       |        |
|----------|----------------------------|------|-------|-----|--------|-----|--------|-------|-------|--------|
| GCIY     | Gastric cancer             | 32   | 3900  | 70  | 6700   | 81  | 64000  | 121.9 | 95.7  | 790.1  |
| KATOIII  | Gastric cancer             | 142  | 3500  | 61  | 7900   | 7.6 | 62000  | 24.6  | 129.5 | 8157.9 |
| MKN1     | Gastric cancer             | 1200 | 12000 | 560 | 47000  | 560 | 61000  | 10.0  | 83.9  | 108.9  |
| MKN28    | Gastric cancer             | 540  | 17000 | 40  | 5600   | 670 | 65000  | 31.5  | 140.0 | 97.0   |
| MKN45    | Gastric cancer             | 45   | 4000  |     |        |     |        | 88.9  |       |        |
| MKN74    | Gastric cancer             | 180  | 7800  | 88  | 7400   | 620 | 59000  | 43.3  | 84.1  | 95.2   |
| ASPC1    | Pancreatic cancer          | 260  | 14000 | 83  | 28000  | 880 | 75000  | 53.8  | 337.3 | 85.2   |
| BXPC-3   | Pancreatic cancer          | 140  | 4000  | 250 | 48000  | 570 | 55000  | 28.6  | 192.0 | 96.5   |
| KP4-1    | Pancreatic cancer          | 770  | 400   | 640 | 65000  | 510 | 62000  | 0.5   | 101.6 | 121.6  |
| KP4-2    | Pancreatic cancer          | 580  | 370   | 510 | 64000  | 540 | 57000  | 0.6   | 125.5 | 105.6  |
| KP4-3    | Pancreatic cancer          | 820  | 1200  | 430 | 65000  | 730 | 44000  | 1.5   | 151.2 | 60.3   |
| MiaPaca2 | Pancreatic cancer          | 150  | 370   | 560 | 55000  | 530 | 61000  | 2.5   | 98.2  | 115.1  |
| Panc1    | Pancreatic cancer          | 790  | 4000  | 570 | 65000  | 530 | 54000  | 5.1   | 114.0 | 101.9  |
| PK1      | Pancreatic cancer          | 340  | 15000 | 450 | 32000  | 500 | 58000  | 44.1  | 71.1  | 116.0  |
| PK8      | Pancreatic cancer          | 130  | 7700  | 290 | 54000  | 73  | 30000  | 59.2  | 186.2 | 411.0  |
| PK9      | Pancreatic cancer          | 270  | 7900  | 82  | 39000  | 500 | 54000  | 29.3  | 475.6 | 108.0  |
| T3M4     | Pancreatic cancer          | 270  | 8800  | 78  | 32000  | 390 | 60000  | 32.6  | 410.3 | 153.8  |
| hu2      | Liver cancer               | 260  | 18000 | 90  | 68000  | 590 | 65000  | 69.2  | 755.6 | 110.2  |
| C32TG    | Melanoma                   | 4900 | 20000 | 59  | 6800   | 440 | 29000  | 4.1   | 115.3 | 65.9   |
| G361     | Melanoma                   | 123  | 7100  | 63  | 7700   | 95  | 24000  | 57.7  | 122.2 | 252.6  |
| Colo320  | Colon cancer               | 390  | 21000 | 350 | 47000  | 470 | 76000  | 53.8  | 134.3 | 161.7  |
| CW-2     | Colon cancer               | 130  | 7400  | 770 | 510000 | 520 | 82000  | 56.9  | 662.3 | 157.7  |
| DLD-1    | Colon cancer               | 440  | 3400  | 64  | 6300   | 570 | 57000  | 7.7   | 98.4  | 100.0  |
| GCT-IZ   | Giant-cell tumor           | 2200 | 7000  | 700 | 50000  | 80  | 53000  | 3.2   | 71.4  | 662.5  |
| HOS      | Osteosarcoma               | 350  | 3900  | 68  | 23000  | 72  | 76000  | 11.1  | 338.2 | 1055.6 |
| HuO      | Osteosarcoma               | 2300 | 12000 | 570 | 61000  | 300 | 9000   | 5.2   | 107.0 | 30.0   |
| MC3T3-E1 | Osteosarcoma               | 590  | 4100  |     |        |     |        | 6.9   |       |        |
| MG67     | Osteosarcoma               | 5000 | 8800  | 600 | 61000  | 760 | 54000  | 1.8   | 101.7 | 71.1   |
| NY       | Osteosarcoma               | 500  | 1400  |     |        |     |        | 2.8   |       |        |
| OST      | Osteosarcoma               | 810  | 2500  | 600 | 370000 | 55  | 54000  | 3.1   | 616.7 | 981.8  |
| SAOS2    | Osteosarcoma               | 370  | 5400  | 86  | 6500   | 89  | 49000  | 14.6  | 75.6  | 550.6  |
| TAKAO    | Osteosarcoma               | 740  | 17000 | 510 | 54000  | 550 | 120000 | 23.0  | 105.9 | 218.2  |
| LK-2     | Lung cancer NSCLC Squamous | 800  | 5800  | 97  | 26000  | 440 | 47000  | 7.3   | 268.0 | 106.8  |
| SBC-2    | Lung cancer SCLC           | 650  | 20000 | 74  | 13000  | 700 | 360000 | 30.8  | 175.7 | 514.3  |
| PC-3     | Prostate cancer            | 220  | 18000 | 65  | 6100   | 860 | 4600   | 81.8  | 93.8  | 5.3    |
| HT1080   | Fibrosarcoma               | 93   | 1200  | 80  | 9900   | 52  | 850    | 12.9  | 123.8 | 16.3   |

|      |                          |     |        |     |        |     |        |        |        |         |
|------|--------------------------|-----|--------|-----|--------|-----|--------|--------|--------|---------|
| Mean | Hematopoietic tumors     | 237 | 77775  | 127 | 303357 | 104 | 288756 | 795.9  | 3486.5 | 12868.7 |
| SD   |                          | 403 | 117286 | 135 | 201007 | 146 | 211171 | 1423.7 | 3182.2 | 22027.4 |
| Mean | Non-hematopoietic tumors | 767 | 9570   | 298 | 68299  | 463 | 75982  | 26.5   | 297.4  | 577.6   |
| SD   |                          | 916 | 59710  | 240 | 158038 | 655 | 157633 | 28.9   | 353.2  | 1499.2  |
| Mean | All tumors               | 658 | 23561  | 259 | 111119 | 386 | 121374 | 184.3  | 903.5  | 3199.7  |
| SD   |                          | 916 | 59710  | 240 | 158038 | 655 | 157633 | 702.4  | 1855.5 | 11216.5 |

<sup>1</sup> Data for compound 7 inhibition of the growth of tumor cell lines<sup>1</sup> and for zoledronate have been previously reported<sup>2</sup>. Averages for TNF- $\alpha$  release omit data from Daudi and RPMI8226 because they directly stimulate V $\gamma$ 2V $\delta$ 2 T cells in the absence of bisphosphonates.

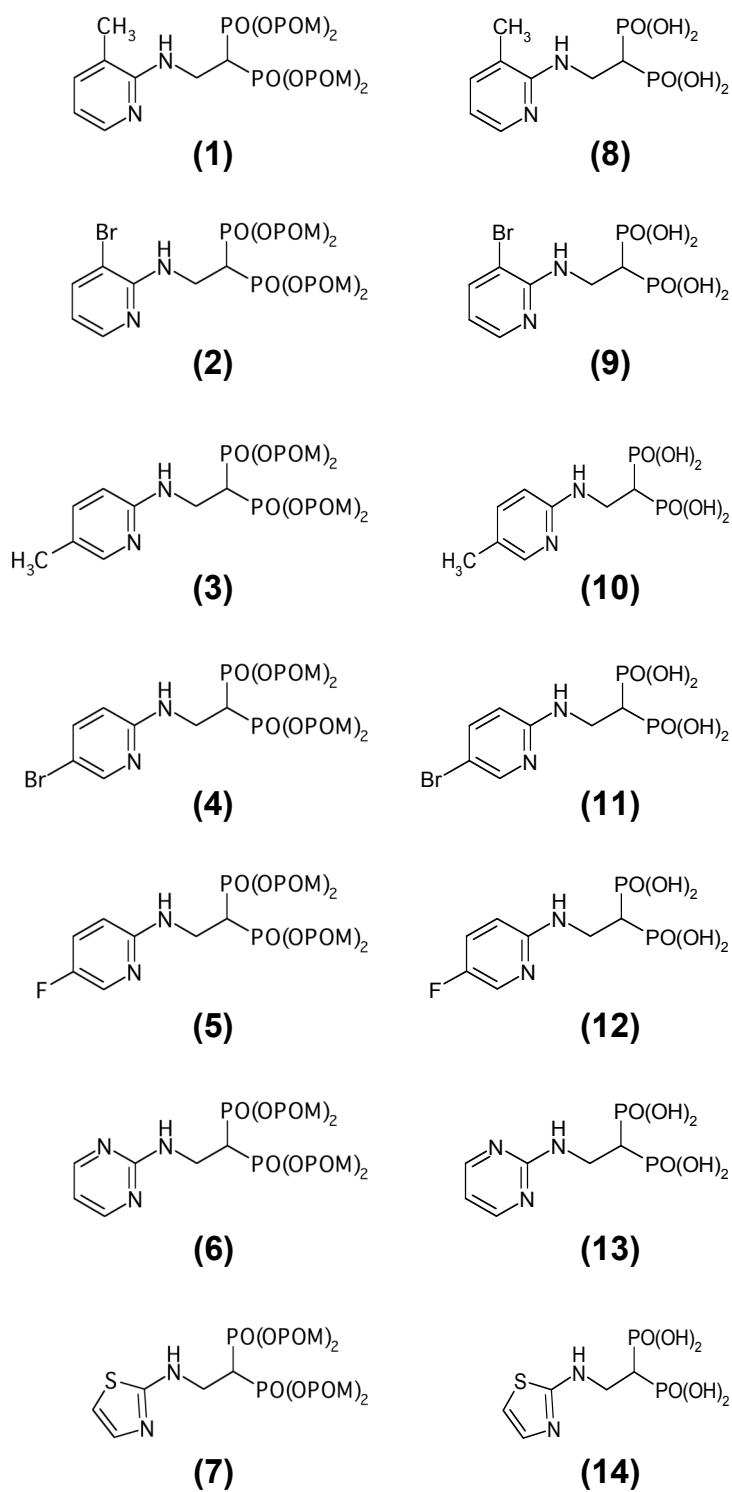

**Supplemental Figure S1. Structures of pivoxil ester prodrugs and their acid forms.** Pivoxil ester prodrugs (1-7) and their corresponding acids (8-14) are depicted. Details of their synthesis are previously described<sup>1</sup>.

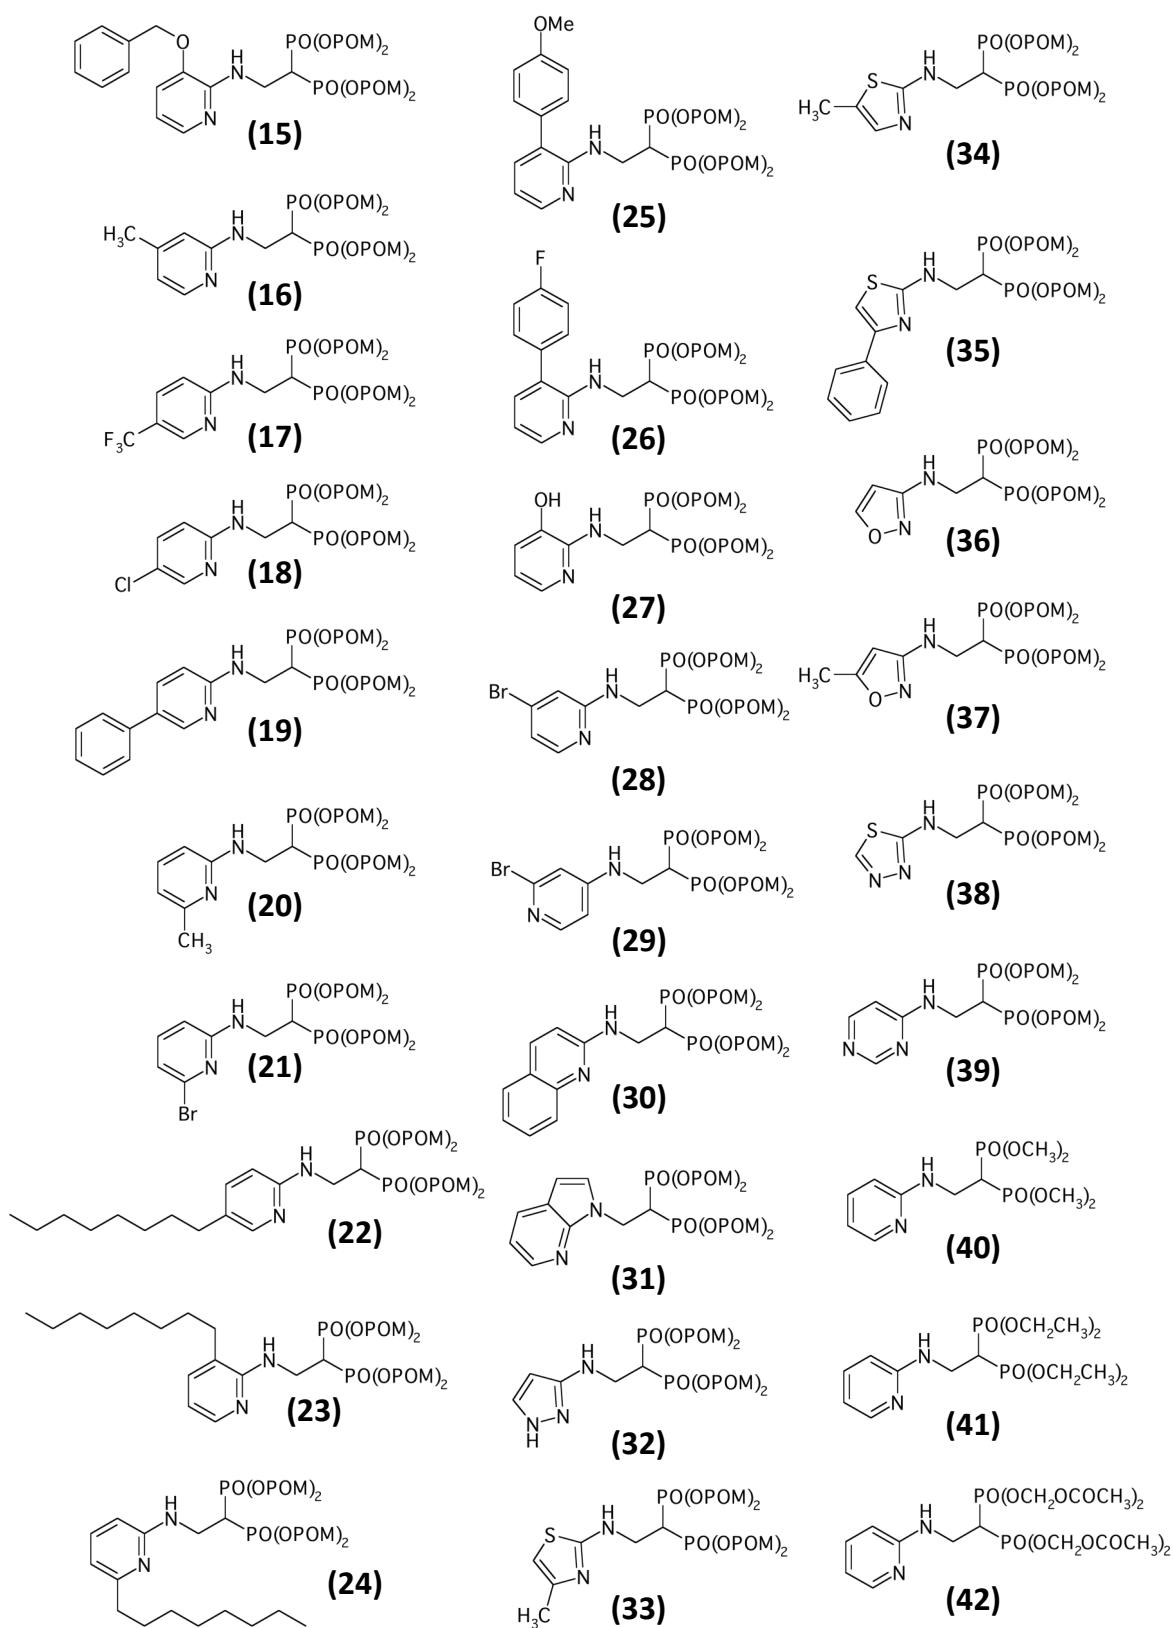

**Supplemental Figure S2. Structures of pivoxil ester prodrugs (15-42).** Details of their synthesis are previously described<sup>1</sup>.

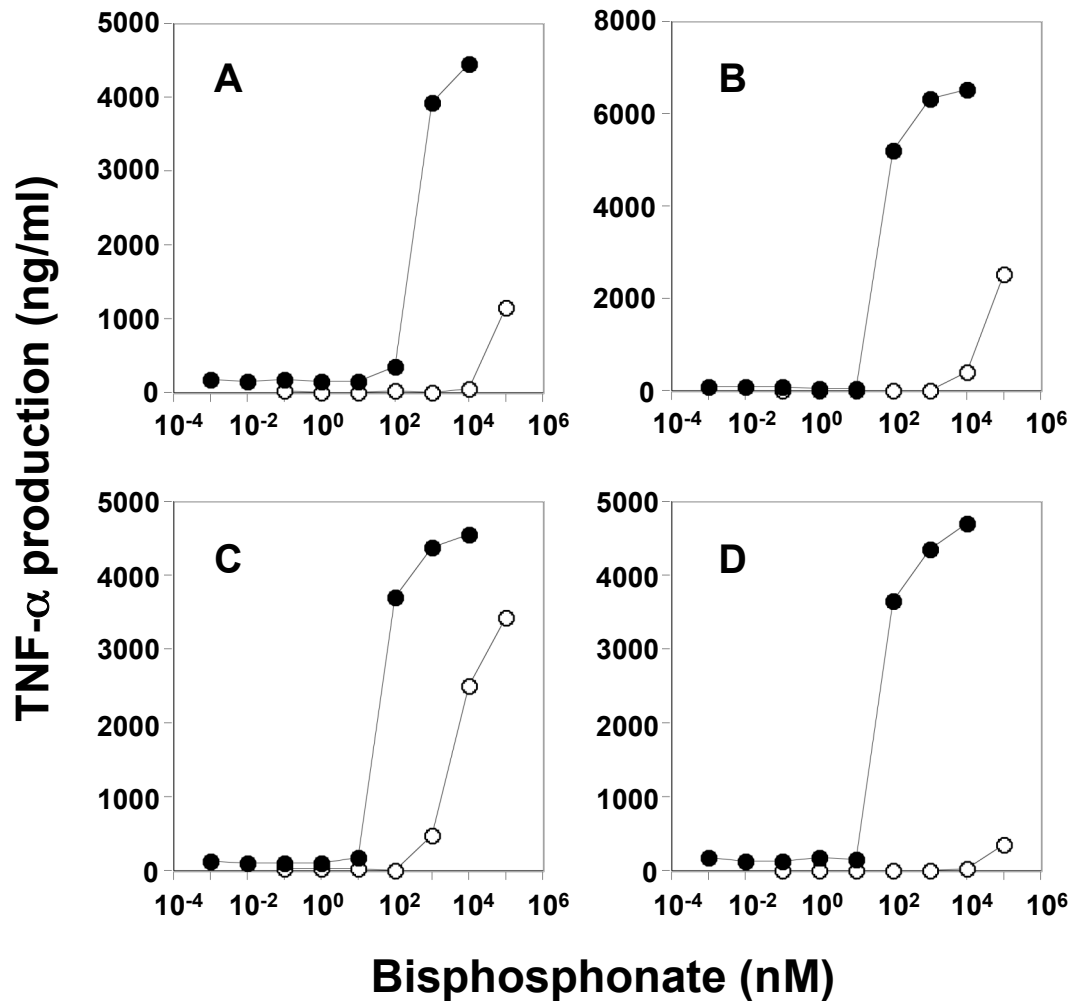

**Supplemental Figure S3. Effect of pivoxil esterification on TNF- $\alpha$  secretion from  $\gamma\delta$  T cells stimulated with bisphosphonate-pretreated tumor cells.** TNF- $\alpha$  production from  $\gamma\delta$  T cells in response to tumor cells pretreated with various concentrations of compound 7 (●) was compared with that of compound 14 (○): A; MKN1 gastric carcinoma, B; PC-3 prostatic carcinoma, C; G-361 melanoma, D; TFK-1 cholangiocell carcinoma.



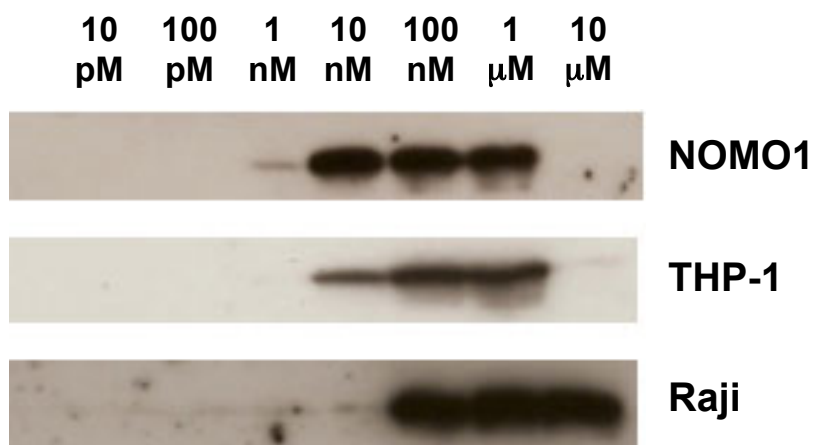

**Supplemental Figure S4. Inhibition of geranylgeranylation of RAP1A in tumor cells by compound 7.** Tumor cells were resuspended in 90 ml of complete RPMI 1640 medium supplemented with 10% fetal bovine serum (FBS, Sigma, St. Louis, MO),  $10^{-5}$  M 2-mercaptoethanol (Invitrogen Corp., Carlsbad, CA), 100 IU/ml of penicillin (Meiji Seika Kaisha, Ltd., Chuo-Ku, Tokyo, Japan), and 100 μg/ml of streptomycin (Meiji Seika Kaisha) and grown overnight at 37°C with 5% CO<sub>2</sub> in 225 cm<sup>2</sup> flasks. Compound 7 was then added to the flasks to the concentrations indicated above. After incubation for 16 h, the cells were harvested and resuspended in 100 μl of lysis solution containing 1% NP-40 (Wako Pure Chemical Industries Ltd., Chuo-ku, Osaka, Japan), 0.1% sodium dodecyl sulfate (SDS) (Tokyo Chemistry Industry Co., Ltd., Chuo-Ku, Tokyo, Japan), and 0.5% sodium deoxycholate (Wako) in microcentrifuge tubes. After centrifugation at 15,000 rpm for 10 min, the supernatants were transferred to new tubes and SDS-urea buffer containing 6.7 M urea (Wako), 5% SDS (Tokyo Chemistry Industry), 100 mM Tris-HCl buffer, pH 7.4 (Wako), 0.25% bromophenol blue (Wako), and 50 mM dithiothreitol (Wako) were added to give a protein concentration of 5 mg/ml. The samples were loaded on 15% polyacrylamide slab gels (Daiichi Pure Chemicals Co., Ltd., Chuo-ku, Tokyo, Japan) at 50 μg/lane, and electrophoresed at 120 mA/h. The proteins were then transferred onto Polyscreen (R) PVDF Transfer Membranes (PerkinElmer Inc., Waltham, MA) treated with goat anti-unprenylated RAP1A Ab (1 to 500, Santa Cruz Biotechnology Inc., Santa Cruz, CA), and horse radish peroxidase-conjugated antigoat IgG Ab (1 to 5,000, KPL Inc., Gaithersburg, MD), followed by SuperSignal West Pico Chemiluminescent Substrate (Thermo Scientific, Rockford, IL). Although not shown, controls using goat anti-RAP1A and anti-GAPDH Abs (Santa Cruz Biotechnology) were included in this study. Chemiluminescence was detected on Amersham Hyperfilm<sup>TM</sup> MP (GE Healthcare Ltd., Little Chalfont, Buckinghamshire, UK) using a Fuji Medical Film Processor FPM100 (Fuji Film Co., Ltd., Ashigara, Kanagawa, Japan). Of the 73 tumor cell lines tested, images from three representative cells are shown above. The strength of the signal for each protein band was determined by the brightness of the corresponding part of the image scanned using a LAS-4000 Mini Luminescent Image Analyzer (Fuji Film Co., Ltd.). The dose-dependency curves in Figure 4 are based on digitized data.

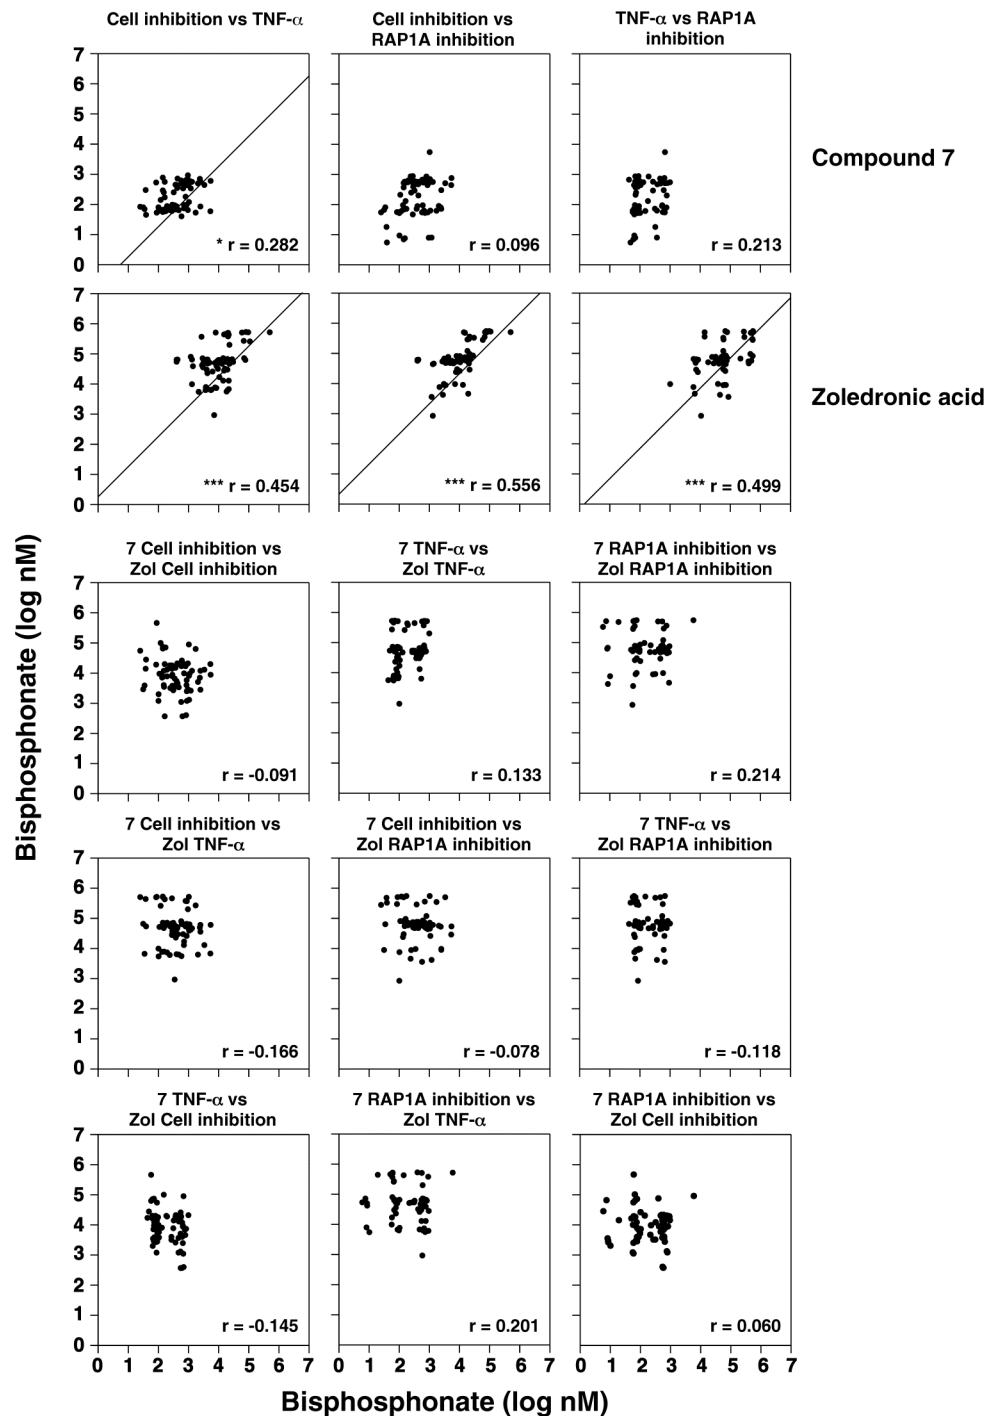

**Supplemental Figure S5. Correlation between activity of compound 7 or zoledronic acid for  $\gamma\delta$  T cell activation, FDPS inhibition, and tumor cell growth inhibition.** The correlations for compound 7, zoledronic acid, and 7 / zoledronic acid concentrations required for half-maximal stimulation of TNF- $\alpha$  secretion by  $\gamma\delta$  T cells, half-maximal inhibition of RAP1A prenylation in tumor cells, and half-maximal inhibition of tumor cell growth are shown. The compound 7 tumor cell growth inhibition data and the zoledronic acid data were previously reported<sup>1,2</sup> and are shown for comparison. Data from Daudi and RPMI8226 are omitted from the analysis because they directly stimulate  $\gamma\delta$  T cells.  $r$  = Pearson's correlation coefficient. \* $p$  < 0.02 \*\*\* $p$  < 0.0001

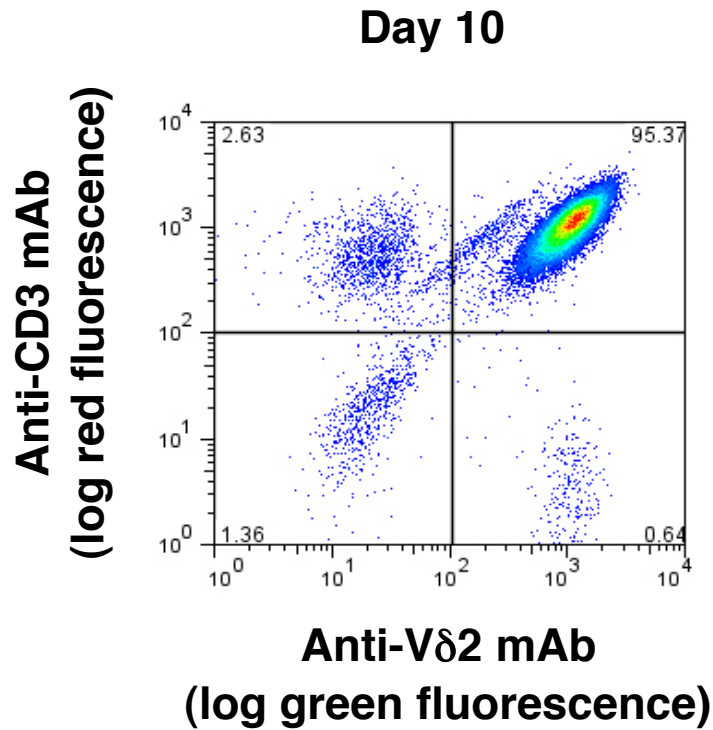

**Supplemental Figure S6. Purity of  $\gamma\delta$  T cells expanded by zoledronic acid used in adoptive immunotherapy experiments in Figure 6 and 7.** PBMC from normal donors was stimulated with zoledronic acid for 10 days as described. Expanded  $\gamma\delta$  T cells were washed, frozen, and then thawed to treat NOG mice inoculated with either EJ-1 or HT1080 tumor cell lines. Purity of  $\gamma\delta$  T cells was between 95-98%.

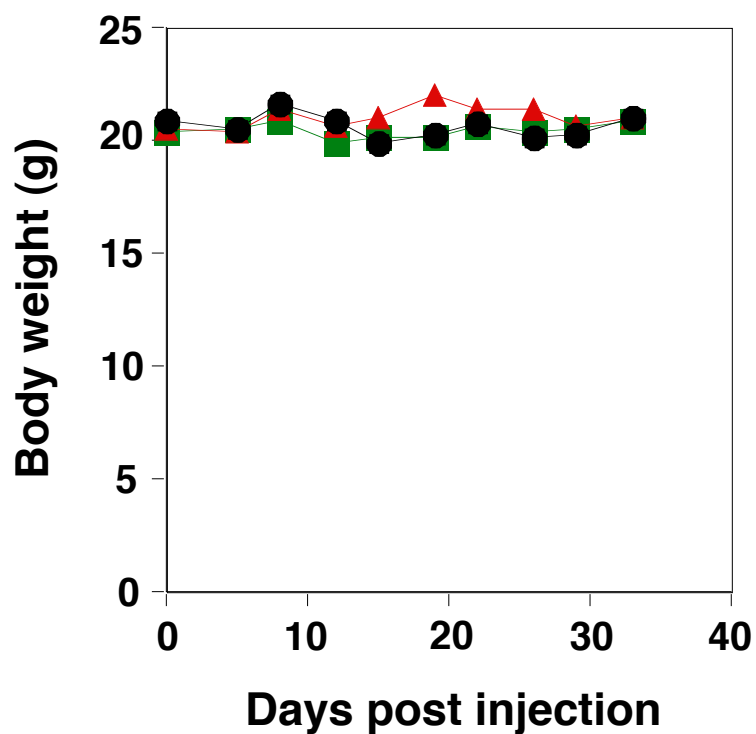

**Supplemental Figure S7. Toxicity of compound 7 for mice.** Three 8-week old female Balb/c mice were intraperitoneally injected with 30  $\mu$ g of compound 7 and body weight was measured for 33 days after injection. Representative of two experiments.

## References

1. Matsumoto, K. *et al.* Targeting cancer cells with a bisphosphonate prodrug. *ChemMedChem* **11**, 2656-2663 (2016).
2. Idrees, A.S. *et al.* Comparison of  $\gamma\delta$  T cell responses and farnesyl diphosphate synthase inhibition in tumor cells pretreated with zoledronic acid. *Cancer Sci* **104**, 536-542 (2013).
